# Supplementary material for: Health-Related Quality of Life (HRQoL) and the Effect on Outcome in Patients Presenting with Coronary Artery Disease and Treated with Percutaneous Coronary Intervention (PCI): Differences Noted by Sex and Age
Source: MDPI journal article supplement (doi:10.3390/jcm11175231), 2022-09-05
Supplement: s1 [file s1]

Supplementary Table S1: Baseline Characteristics of patients by availability of pre-procedure HRQoL.

| Characteristics n (%)                | QoL info <i>not</i> available | QoL info available   | P value |
|--------------------------------------|-------------------------------|----------------------|---------|
|                                      | 8607                          | 6591                 |         |
| Male                                 | 6534 (76.0%)                  | 5068 (76.9%)         | 0.19    |
| Age, years, mean (SD)                | 68.4 (10.9) (n=8595)          | 69.2 (10.0) (n=6583) | <0.001  |
| Diabetes                             | 2110 (24.5%)                  | 1587 (24.1%)         | 0.53    |
| Hypertension                         | 6238 (72.5%)                  | 4760 (72.2%)         | 0.73    |
| Family History of CAD                | 3228 (37.5%)                  | 2214 (33.6%)         | <0.001  |
| Smoking (past or current)            | 4335 (50.4%)                  | 3550 (53.9%)         | <0.001  |
| BMI, kg/m <sup>2</sup> ±SD           | 28.8 (5.0) (n=7762)           | 29.0 (5.0) (n=6109)  | 0.03    |
| LVEF, mean ± SD                      | 57.0 (10.6) (n=6829)          | 56.7 (9.4) (n=5650)  | 0.17    |
| Previous MI                          | 1910 (22.2%)                  | 1425 (21.6%)         | 0.40    |
| Previous Peripheral Vascular Disease | 641 (7.4%)                    | 467 (7.1%)           | 0.39    |
| Previous PCI                         | 2841 (33.0%)                  | 2077 (31.5%)         | 0.05    |
| Previous Cerebrovascular disease     | 579 (6.7%)                    | 450 (6.8%)           | 0.81    |
| Previous CABG                        | 933 (10.8%)                   | 702 (10.7%)          | 0.71    |
| Previous HF                          | 466 (5.4%)                    | 313 (4.7%)           | 0.07    |
| Current HF (<2 wks)                  | 350 (4.1%)                    | 190 (2.9%)           | <0.001  |
| Renal failure                        | 485 (5.6%)                    | 314 (4.8%)           | 0.01    |
| <b>Clinical presentation</b>         |                               |                      |         |
| STEMI                                | 686 (8.4%)                    | 374 (5.8%)           | <0.001  |
| NSTEMI                               | 1847 (22.7%)                  | 1408 (21.7%)         | 0.16    |
| Unstable angina                      | 1331 (16.3%)                  | 1025 (15.8%)         | 0.38    |
| Elective                             | 4278 (52.5%)                  | 3675 (56.7%)         | <0.001  |
| Cardiogenic Shock                    | 54 (0.6%)                     | 15 (0.2%)            | <0.001  |

CAD-Coronary artery disease; BMI-Body mass index; LVEF-Left ventricular ejection fraction; CABG-

Coronary artery bypass grafting; MI-Myocardial infarction; HF-Heart failure; STEMI-ST-elevation myocardial infarction; NSTEMI-Non-ST-elevated myocardial infarction; SD-Standard deviation.

Renal failure/impairment is defined as either (a) Sr. Creatinine >2mg/dl and/or (b) having renal failure/receiving dialysis.

Supplementary Table S2: Pre-procedure HRQoL and its association with mortality and MACE within one-year following procedure in the overall patients and by sex.

| Event            | Overall                  | Women                   | Men                      |
|------------------|--------------------------|-------------------------|--------------------------|
|                  | HR (95% CI)              | HR (95% CI)             | HR (95% CI)              |
| <b>Mortality</b> |                          |                         |                          |
| Unadjusted       | 3.09 (1.89-5.06) p<0.001 | 1.32 (0.57-3.05) p=0.52 | 4.72 (2.52-8.84) p<0.001 |
| Adjusted*        | 2.41 (1.44-4.02) p=0.001 | 1.02 (0.41-2.54) p=0.97 | 3.99 (2.09-7.65) p<0.001 |
| <b>MACE</b>      |                          |                         |                          |
| Unadjusted       | 1.36 (1.06-1.74) p=0.02  | 1.31 (0.81-2.10) p=0.27 | 1.38 (1.03-1.84) p=0.03  |
| Adjusted*        | 1.31 (1.02-1.69) p=0.04  | 1.27 (0.78-2.08) p=0.34 | 1.31 (0.97-1.77) p=0.07  |

\* Adjusted for age, male (except for gender specific analysis), BMI, Smoking ever, PCI presentation, diabetes, LVEF, Previous MI, PVD, previous CABG, HF within prior 2 weeks of PCI, renal failure, cardiogenic shock
